# Supplementary material
Source: PubMed Central journal article supplement (PMC4293128)
Supplement: Supp_Figure1.pdf [file Supp_Figure1.pdf]

## Supplementary Data

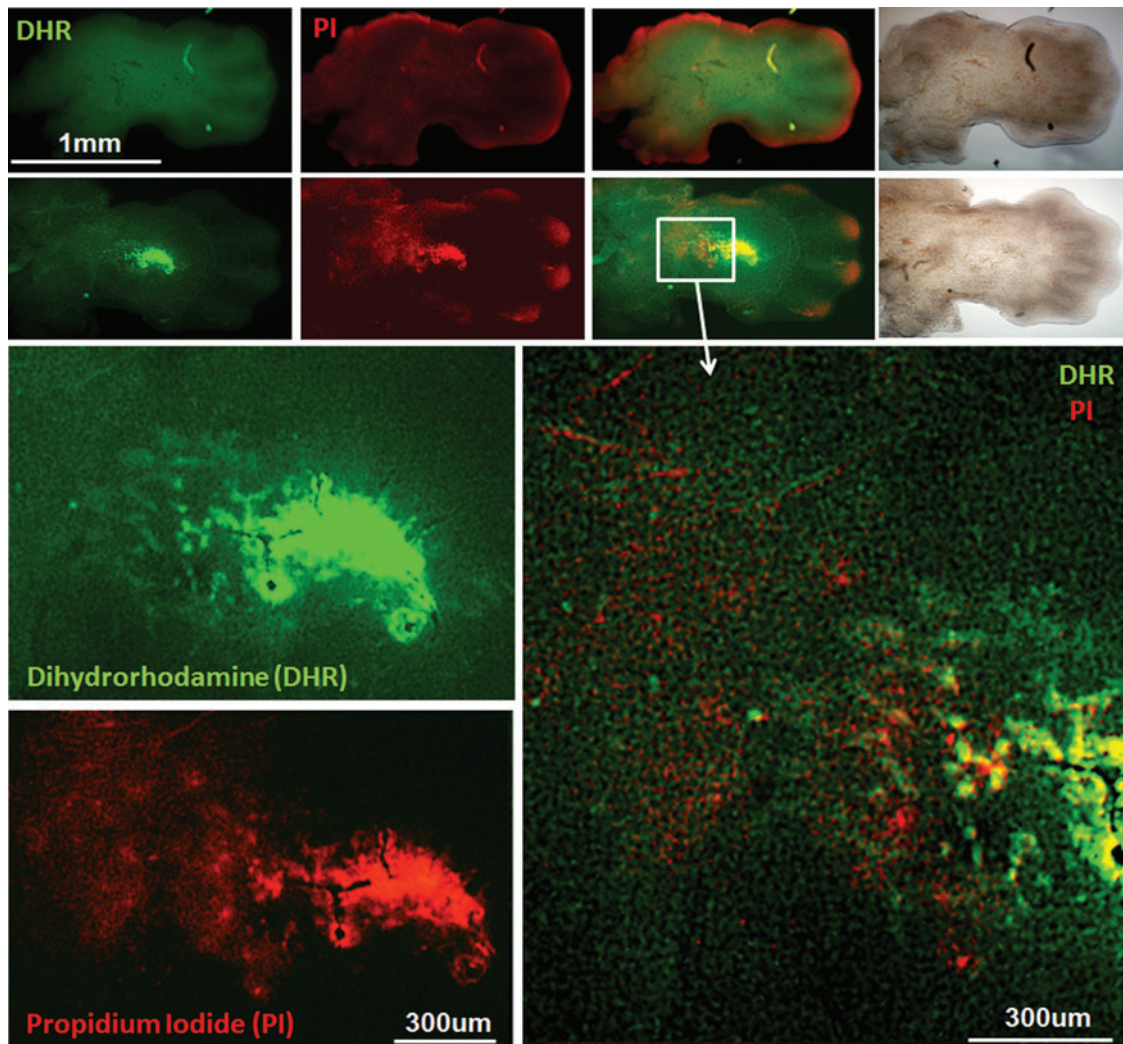

**SUPPLEMENTARY FIG. S1.** To determine the effect of nonthermal (NT)-plasma and reactive oxygen species production on cell viability, the limb autopods were stained with both dihydrorhodamine (DHR), to detect hydrogen peroxide ( $H_2O_2$ ), and propidium iodide (PI), an indicator of cell death. The sham and NT-plasma-treated limb images for each dye, the overlay, and the transmitted light images are shown. A high magnification inset of the NT-plasma treated region and the surrounding area show epithelial cell death primarily localized to the immediate area of treatment.
