# Supplementary material
Source: PubMed Central journal article supplement (PMC4293128)
Supplement: Supp_Table1.pdf [file Supp_Table1.pdf]

SUPPLEMENTARY TABLE S1. PCR PRIMER INFORMATION

| <i>Primer name</i> | <i>Strand</i> | <i>Primer sequence</i>        |
|--------------------|---------------|-------------------------------|
| actin              | FWD           | gct aca gct cac cac cac a     |
| actin              | REV           | tct cca ggg agg aag agg a     |
| Osteocalcin        | FWD           | gac aaa gcc ttc atg tcc aag c |
| Osteocalcin        | REV           | aaa gcc gag ctg cca gag ttt g |
| BMP2               | FWD           | aag aag ccg tgg agg aac tt    |
| BMP2               | REV           | ttc ccg gaa gat ctg gag tt    |
| BSP                | FWD           | agg gag gca gtg act ctt ca    |
| BSP                | REV           | aca ccc gag agt gtg gaa ag    |
| runx2              | FWD           | gcc ggg aat gat gag aac ta    |
| runx2              | REV           | gga ccg tcc act gtc act tt    |
| Fgf2               | FWD           | agc ggc tct act gca aga ac    |
| Fgf2               | REV           | gcc gtc cat ctt cct tca ta    |
| ALK PHOS           | FWD           | tat gtc tgg aac cgc act ga    |
| ALK PHOS           | REV           | cca gca aga aga agc ctt tg    |
| colla1             | FWD           | tcc tgc tgg tga gaa agg at    |
| colla1             | REV           | tcc aga agg acc ttg ttt gc    |
| eNOS               | FWD           | tct tcg ttc agc cat cac ag    |
| eNOS               | REV           | cca gcc atg ttg gat aca ga    |
| SOST               | FWD           | gca agc ctt cag gaa tga tg    |
| SOST               | REV           | aca tct ttg gcg tca tag gg    |
| Col X              | FWD           | cgt gtc tgc ttt tac tgt ca    |
| Col X              | REV           | acc tgg tca ttt tct gtg ag    |
| MMP-13             | FWD           | atc ctg gcc acc ttc ttc tt    |
| MMP-13             | REV           | ttt ctc gga gcc tgt caa ct    |
| CAT                | FWD           | ttg aca gag agc gga ttc ct    |
| CAT                | REV           | tga ctg tgg aga atc gaa cg    |
| OSTERIX            | FWD           | act ggc tag gtg gtg gtc ag    |
| OSTERIX            | REV           | ggt agg gag ctg ggt taa gg    |
